# Supplementary material for: Optimization of the Sustainable Production of Resistant Starch in Rice Bran and Evaluation of Its Physicochemical and Technological Properties
Source: MDPI journal article supplement (doi:10.3390/polym14173662), 2022-09-03
Supplement: s1 [file s1]

# Optimization of the Sustainable Production of Resistant Starch in Rice Bran and Evaluation of Its Physicochemical and Technological Properties

Ruta Vaitkeviciene <sup>1\*</sup>, Joana Bendoraitiene <sup>2</sup>, Rimgaile Degutyte <sup>1</sup>, Mantas Svazas <sup>1</sup> and Daiva Zadeike <sup>1\*</sup>

## SUPPLEMENTARY MATERIALS

### *S.1. Chemical analysis*

Raw material was tested for protein, fibre, fat, and ash contents according to the AACC Official Methods [1]. The crude protein content was determined by the Kjeldahl nitrogen (method 920.152), the percentage of protein was estimated by multiplying the total nitrogen content by a factor of 5.95. Ash was determined by combustion of the sample in a muffle oven at 550 °C (method 942.05). The fat content was determined by Soxhlet extraction method (method 996.01). Total dietary fibre content was determined according to the method 985.29.

### *S.2. Determination of technological properties*

#### *S.2.1. Water and oil absorption capacity*

For water absorption capacity (WAC) and oil absorption capacity (OAC) determination Ahmad et al. [2], 0.5 g of sample was placed in a pre-weighted centrifuge tube and mixed with 6 mL of distilled water or rapeseed oil. After 1 h shaking in a 37°C water bath, the liquid fraction was carefully removed by centrifugation (2,000×g, 15 min). The wet residue was weighed (wet weight), and the water/oil holding capacity was expressed as grams of water/oil absorbed by the gram of starch (g/g).

#### *S.2.2. Water solubility and swelling power*

The measurement of solubility and swelling power of starch was performed according to Li et al. [3] with slight modifications. The sample (0.5 g) of starch (W) was mixed with distilled water (5 mL), and was incubated at 30 °C with continuously shaking for 30 min in a water bath. After, it was cooled to room temperature and centrifuged (3,500×g, 20 min) ( $W_d$ ). The supernatant was transferred to a glass tube and dried in an oven at 105°C to constant weight as water-soluble starch (S). The solubility and swelling power were calculated according to the following equations:

$$\text{Solubility (\%)} = S \times 100 / W \quad (1)$$

$$\text{Swelling power (\%)} = (W_d \times 100) / [W (100 - S)], \quad (2)$$

where  $S$  is the weight of dried supernatant (g),  $W_d$  – is the weight of wet sediment (g), and  $W$  is the sample weight (g). All samples were analysed in triplicate.

### S.3. Experimental section

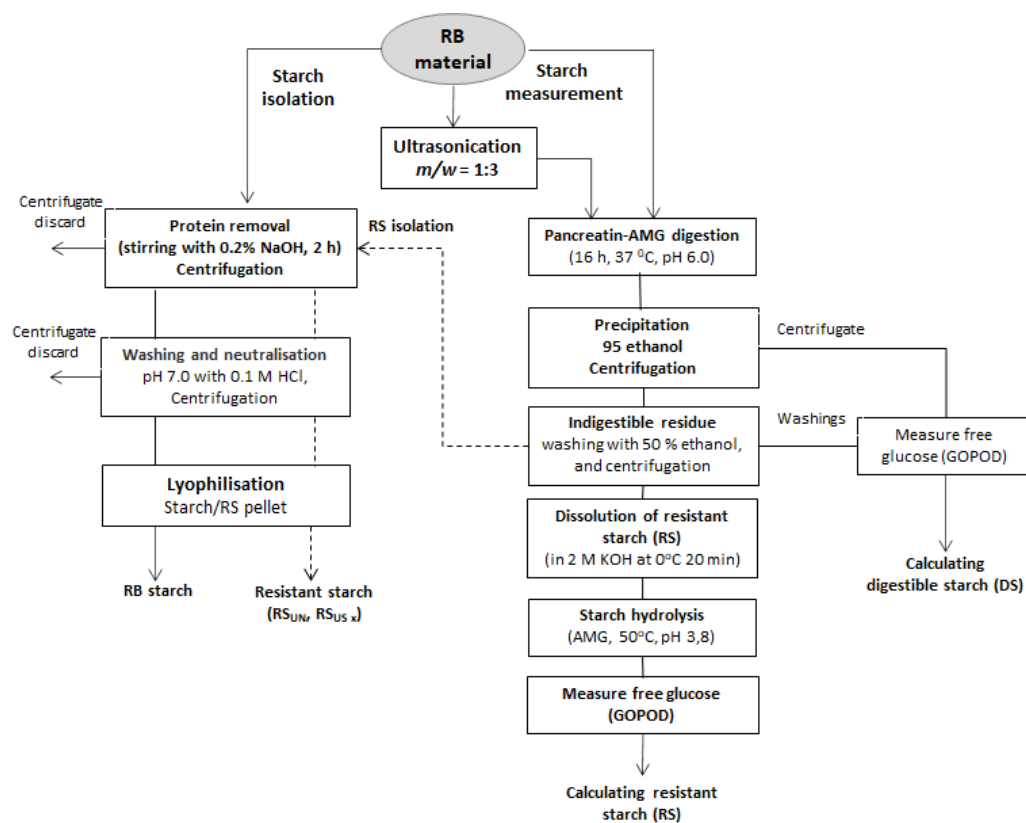

**Figure S1.** Rice bran starch and resistant starch isolation and measurement scheme.

**Table S1.** Multiple comparisons between means of different US (1.3 W/cm<sup>2</sup>) temperature groups (significant at  $p < 0.05$ ).

|        | Mean           |    |         |         |        |
|--------|----------------|----|---------|---------|--------|
|        | Sum of Squares | df | Square  | F       | Sig.   |
| 15 min | 616.423        | 4  | 154.106 | 749.007 | 0.0001 |
| 20 min | 614.204        | 4  | 153.551 | 585.090 | 0.0001 |
| 25 min | 321.119        | 4  | 79.137  | 540.531 | 0.0001 |
| 30 min | 68.8417        | 4  | 19.359  | 412.118 | 0.0001 |
| 35 min | 59.785         | 4  | 14.946  | 267.359 | 0.0001 |

**Table S2.** Multiple comparisons between means of different US (1.3 W/cm<sup>2</sup>) time groups (significant at  $p < 0.05$ ).

|       | Sum of Squares | df | Mean Square | F       | Sig.   |
|-------|----------------|----|-------------|---------|--------|
| 30 °C | 185.611        | 4  | 46.403      | 286.885 | 0.0001 |
| 40 °C | 641.174        | 4  | 160.294     | 560.506 | 0.0001 |
| 50 °C | 372.268        | 4  | 93.067      | 537.090 | 0.0001 |
| 60 °C | 177.368        | 4  | 44.342      | 576.919 | 0.0001 |
| 70 °C | 0.516          | 4  | 0.129       | 21.629  | 0.060  |

**Table S3.** Significant coefficients of quartic model equation in terms of coded factors.

| Factor                        | Coefficient Estimate | df | Standard Error | 95% CI Low | 95% CI High | VIF    |
|-------------------------------|----------------------|----|----------------|------------|-------------|--------|
| Intercept                     | 11.65                | 1  | 0.0324         | 11.58      | 11.72       |        |
| A-Time                        | -3.33                | 1  | 0.0463         | -3.43      | -3.23       | 3.00   |
| B-Temp                        | -0.5519              | 1  | 0.0432         | -0.6496    | -0.4542     | 2.82   |
| C-Power                       | 0.9644               | 1  | 0.0298         | 0.8971     | 1.03        | 2.62   |
| AB                            | -0.8837              | 1  | 0.0328         | -0.9578    | -0.8097     | 1.0000 |
| AC                            | -0.2800              | 1  | 0.0463         | -0.3848    | -0.1752     | 3.00   |
| BC                            | -0.1419              | 1  | 0.0432         | -0.2396    | -0.0442     | 2.82   |
| A <sup>2</sup>                | -3.60                | 1  | 0.0565         | -3.73      | -3.47       | 2.41   |
| B <sup>2</sup>                | -6.27                | 1  | 0.0537         | -6.40      | -6.15       | 2.19   |
| ABC                           | -0.1387              | 1  | 0.0328         | -0.2128    | -0.0647     | 1.0000 |
| A <sup>2</sup> B              | 0.8807               | 1  | 0.0542         | 0.7581     | 1.00        | 2.74   |
| A <sup>2</sup> C              | -0.1399              | 1  | 0.0392         | -0.2287    | -0.0512     | 2.15   |
| AB <sup>2</sup>               | 1.19                 | 1  | 0.0567         | 1.06       | 1.31        | 3.00   |
| B <sup>2</sup> C              | -0.0930              | 1  | 0.0392         | -0.1817    | -0.0042     | 2.32   |
| A <sup>2</sup> B <sup>2</sup> | 2.47                 | 1  | 0.0781         | 2.30       | 2.65        | 3.94   |
| A <sup>2</sup> BC             | -0.0643              | 1  | 0.0542         | -0.1869    | 0.0583      | 2.74   |
| AB <sup>2</sup> C             | 0.3412               | 1  | 0.0567         | 0.2129     | 0.4696      | 3.00   |

**Table S4.** Analysis of variance of the regression parameters for a quartic model for the response factor.

| Source                        | Sum of Squares | df                             | Mean Square | F-value  | p-value  |                 |
|-------------------------------|----------------|--------------------------------|-------------|----------|----------|-----------------|
| <b>Model</b>                  | 389.87         | 16                             | 24.37       | 2839.52  | < 0.0001 | significant     |
| A-Time                        | 44.36          | 1                              | 44.36       | 5168.84  | < 0.0001 |                 |
| B-Temp                        | 1.40           | 1                              | 1.40        | 163.30   | < 0.0001 |                 |
| C-Power                       | 9.01           | 1                              | 9.01        | 1049.64  | < 0.0001 |                 |
| AB                            | 6.25           | 1                              | 6.25        | 728.10   | < 0.0001 |                 |
| AC                            | 0.3136         | 1                              | 0.3136      | 36.54    | 0.0002   |                 |
| BC                            | 0.0927         | 1                              | 0.0927      | 10.80    | 0.0094   |                 |
| A <sup>2</sup>                | 34.80          | 1                              | 34.80       | 4055.14  | < 0.0001 |                 |
| B <sup>2</sup>                | 117.02         | 1                              | 117.02      | 13636.80 | < 0.0001 |                 |
| ABC                           | 0.1540         | 1                              | 0.1540      | 17.95    | 0.0022   |                 |
| A <sup>2</sup> B              | 2.27           | 1                              | 2.27        | 263.98   | < 0.0001 |                 |
| A <sup>2</sup> C              | 0.1092         | 1                              | 0.1092      | 12.72    | 0.0061   |                 |
| AB <sup>2</sup>               | 3.75           | 1                              | 3.75        | 437.29   | < 0.0001 |                 |
| B <sup>2</sup> C              | 0,0482         | 1                              | 0,0482      | 5,62     | 0,0419   |                 |
| A <sup>2</sup> B <sup>2</sup> | 8,59           | 1                              | 8,59        | 1001,51  | < 0.0001 |                 |
| A <sup>2</sup> BC             | 0,0121         | 1                              | 0,0121      | 1,41     | 0,2658   |                 |
| AB <sup>2</sup> C             | 0,3105         | 1                              | 0,3105      | 36,19    | 0,0002   |                 |
| <b>Residual</b>               | 0,0772         | 9                              | 0,0086      |          |          |                 |
| Lack of Fit                   | 0,0228         | 1                              | 0,0228      | 3,34     | 0,1049   | not significant |
| Pure Error                    | 0,0545         | 8                              | 0,0068      |          |          |                 |
| <b>Std. Dev.</b>              | 0,0926         | <b>R<sup>2</sup></b>           | 0,9998      |          |          |                 |
| <b>Mean</b>                   | 7,78           | <b>Adjusted R<sup>2</sup></b>  | 0,9994      |          |          |                 |
| <b>C.V. %</b>                 | 1,19           | <b>Predicted R<sup>2</sup></b> | 0,9736      |          |          |                 |
|                               |                | <b>Adeq Precision</b>          | 153,6987    |          |          |                 |

## References

1. *Approved Methods of the AACC International*, 10th ed.; The Association AACC: Saint Paul, MN, USA, 2000.
2. Ahmad, M.; Gani, A.; Masoodi, F.A.; Rizvi, S.H. Influence of ball milling on the production of starch nanoparticles and its effect on structural, thermal, and functional properties. *Int. J. Biol. Macromol.* **2020**, *151*, 85–91.
3. Li, A.; Gao, Q.; Ward, R. Physicochemical properties and in vitro digestibility of resistant starch from mung bean (*Phaseolus radiatus*). *Starch/Stärke* **2011**, *63*, 171–178.
